# Supplementary material for: Mobile open dynamic chamber measurement of methane macroseeps in lakes
Source: Copernicus journal article supplement (doi:10.5194/hess-2020-420), 2020-09-09
Supplement: Supplementary file [file hess-2020-420-AC1-supplement.pdf]

## Supporting information, L78

From  $M_B$ , the volume of the bubbles ( $V_B$ ) and their equivalent spherical diameter ( $d_B$ ) **at atmospheric pressure** were determined, assuming that the  $\text{CH}_4$  content in the bubbles ( $\%_{\text{CH}_4}$ ) is known, according to Eq. (S5) and (S6), respectively.

$$V_B = \frac{M_B}{16} \cdot \frac{R \cdot T}{P} \cdot \frac{1}{\%_{\text{CH}_4}} \quad (\text{S5})$$

$$d_B = 2 \cdot \sqrt[3]{\frac{3 \cdot V_B}{4 \cdot \pi}} \quad (\text{S6})$$

where 16 is the molecular weight of  $\text{CH}_4$  (g),  $R$  is the universal gas constant ( $\text{L atm mol}^{-1} \text{K}^{-1}$ ),  $T$  is the temperature (K) and  $P$  is the atmospheric pressure (atm).

Since bubble volume and diameters are important for mass transfer determination during their migration to the lake surface, the actual bubble volume ( $V'_B$ ) at a given depth ( $D$ ) within the water column is given by Eq. (S7).

$$V'_B = V_B \cdot \frac{P}{\frac{(\rho \cdot g \cdot D)}{101,325} + P} \quad (\text{S7})$$

where  $\rho$  is the water volumetric mass density ( $\text{kg m}^{-3}$ ),  $g$  is the standard gravity ( $\text{m s}^{-2}$ ), and 101,325 is the conversion factor from Pa to atm.
